# Supplementary material
Source: publisher site journal article supplement (https://www.spandidos-publications.com/1275/downloadSupplementary)

Figure S1. Intracellular photosensitizer levels in colorectal cancer cells. (A) SW480, (B) HCT116, (C) LoVo and (D) DLD1 cells were incubated with 5  $\mu$ M Ce6 for the indicated times and then washed with PBS. Intracellular photosensitizer was measured by detection of fluorescence. Data are presented as the mean  $\pm$  SEM of three experiments. Data were analyzed with ANOVA and Tukey's post hoc test. \*\*P<0.001, \*\*\*\*P<0.0001. Ce6, chlorin e6.

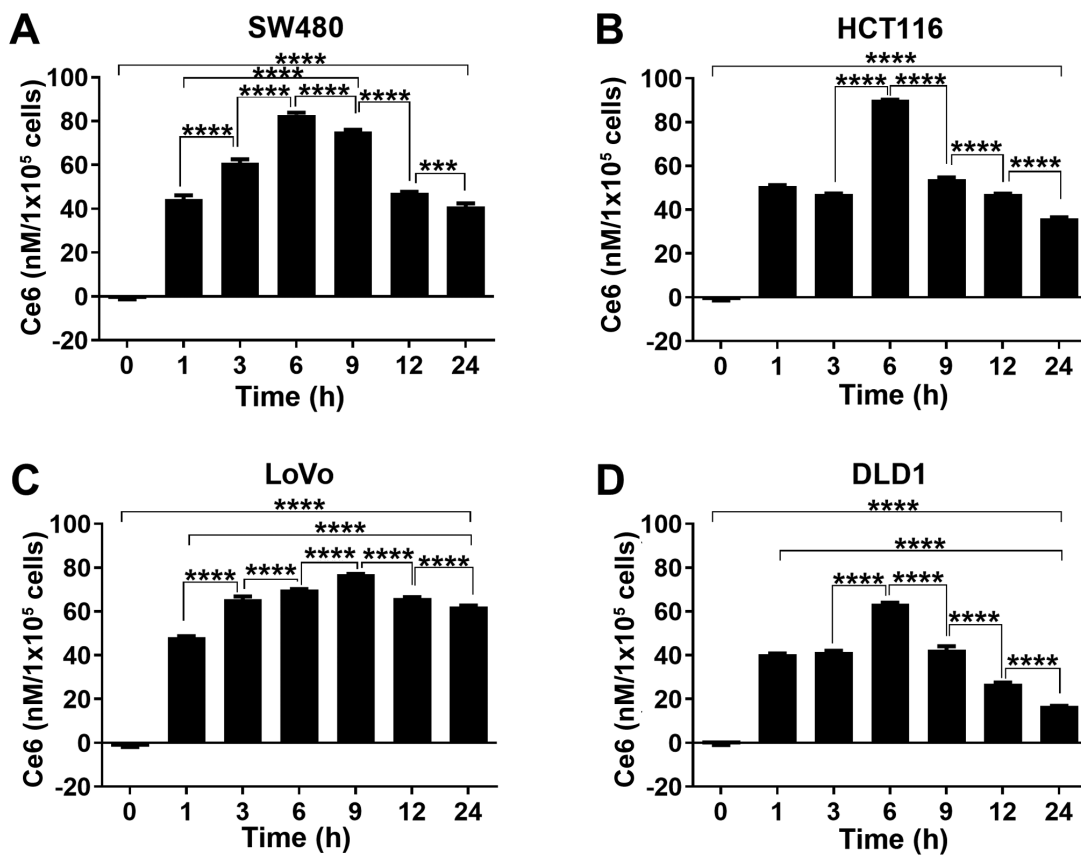

Figure S2. Expression level of p62 in p62 siRNA treated colorectal cancer cells. Lysate from silenced cells were subjected to immunoblot analysis with antibody to p62. siRNA, small interfering RNA; CTRL, control.

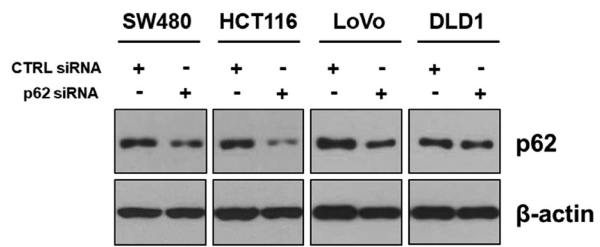

Figure S3. Antitumor effect of p62 overexpression in photodynamic therapy. (A) SW480 and SW480-p62 cells were collected and inoculated into BALB/c nude mice by subcutaneous injection. Solid tumor collected in 19 days of treatment. (B) LoVo and LoVo-p62 cells collected and inoculated into BALB/c nude mice by subcutaneous injection. Solid tumor collected in 22 days of treatment. Ce6, chlorin e6; IR, irradiation.

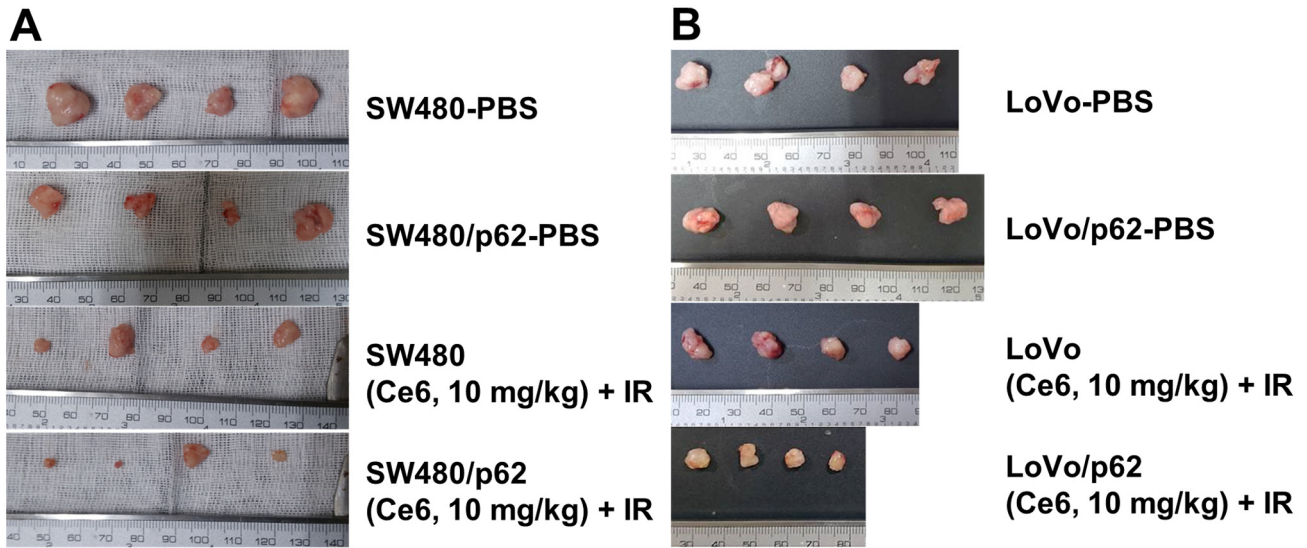

Supplement: Supplementary file 1 [file downloadSupplementary]
